# Supplementary material
Source: publisher figshare collection journal article supplement (https://springernature.figshare.com/ndownloader/files/21101799)

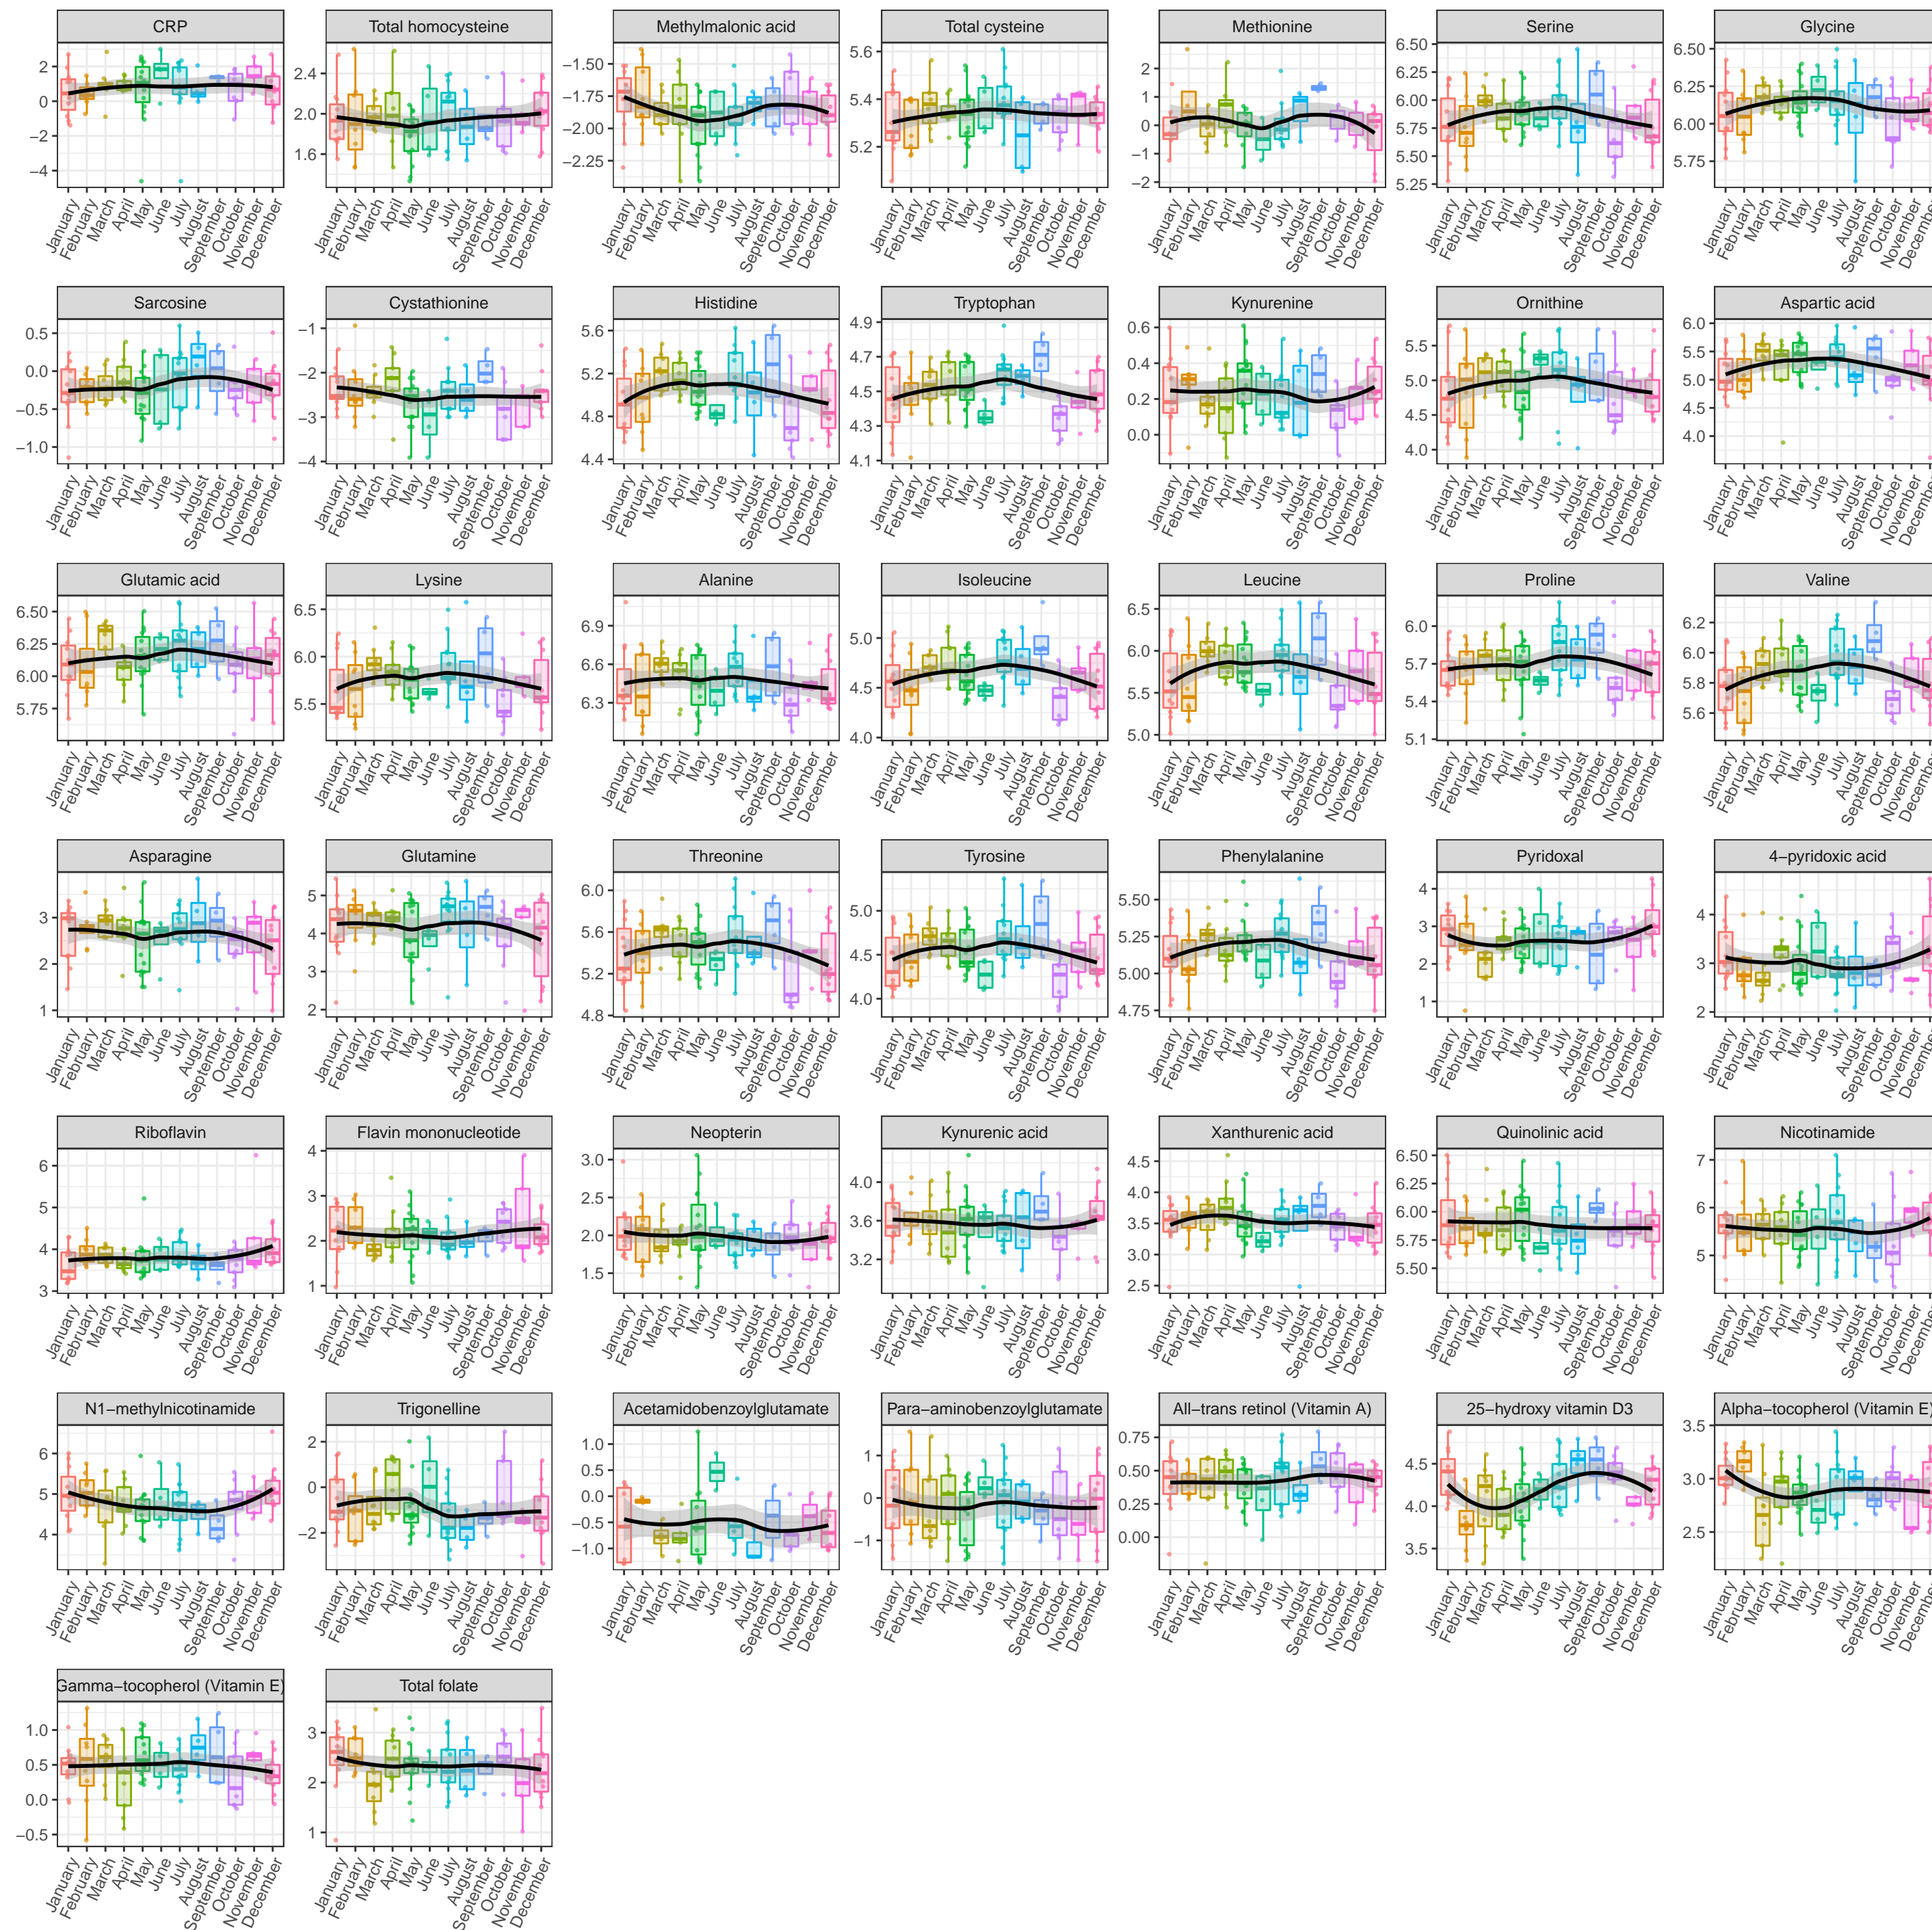

Sampling month

Supplement: Supplementary file 1 [file 21101799]

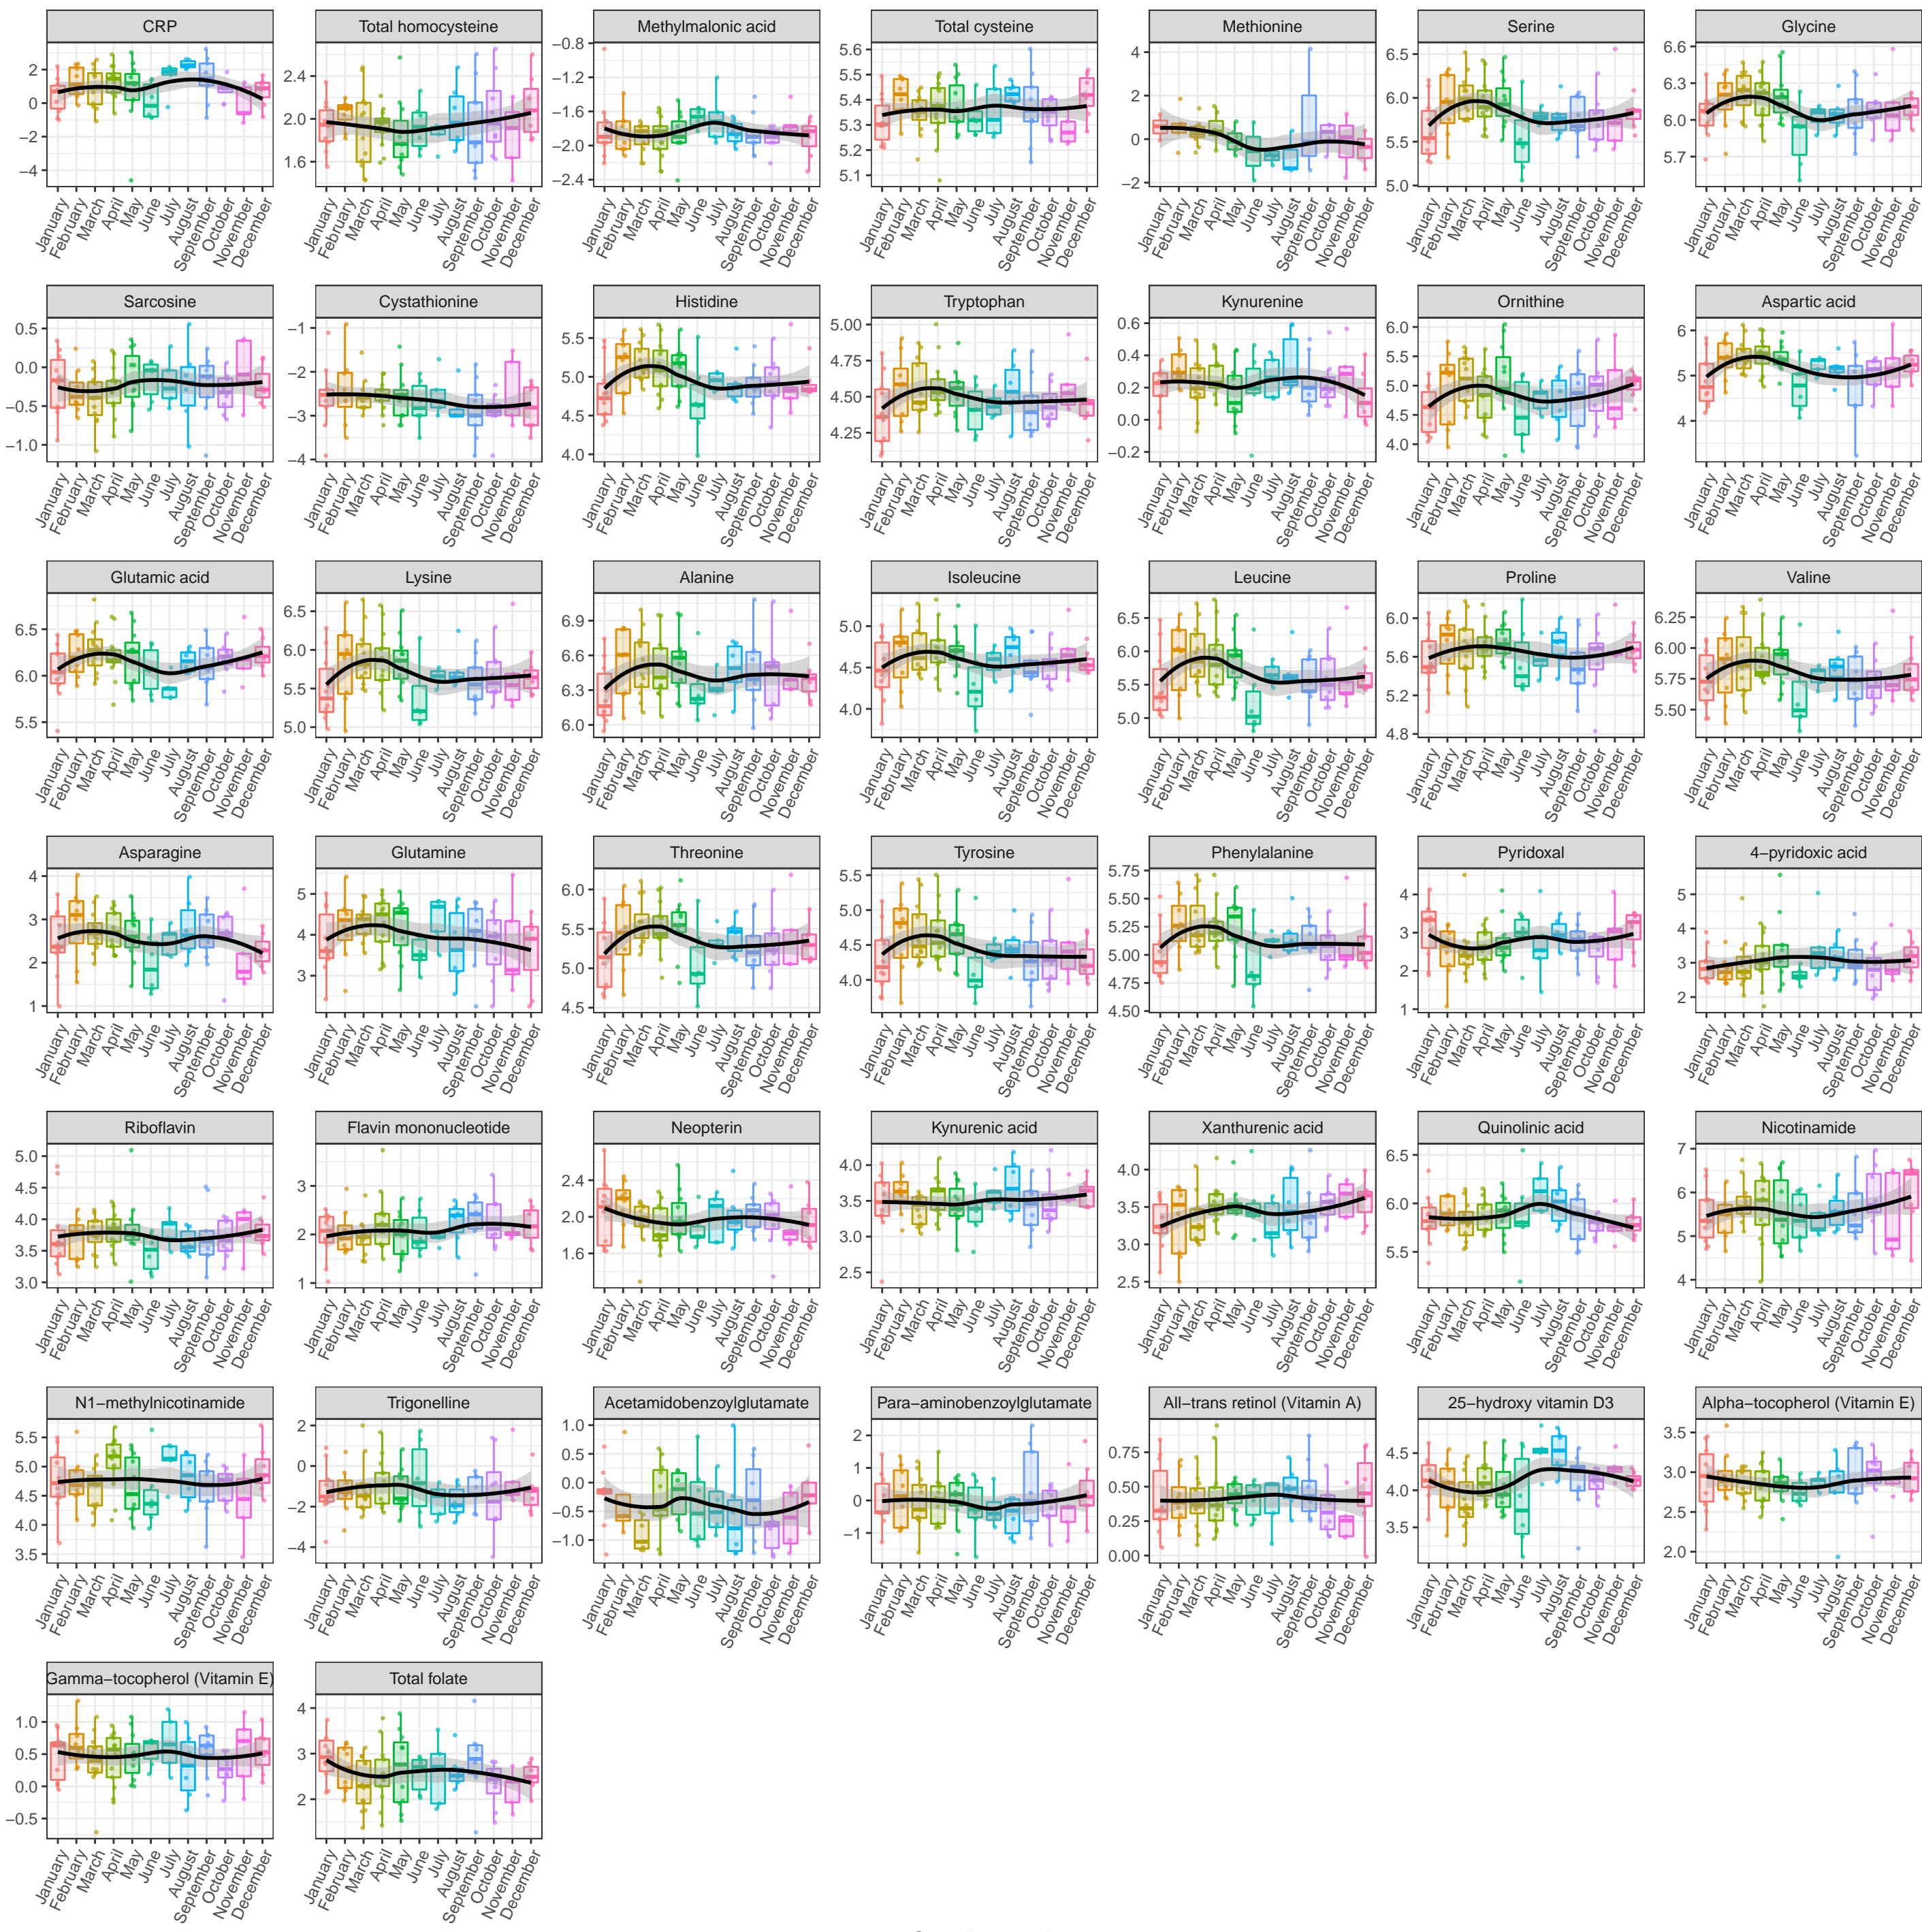

Supplement: Supplementary file 2 [file 21101799]

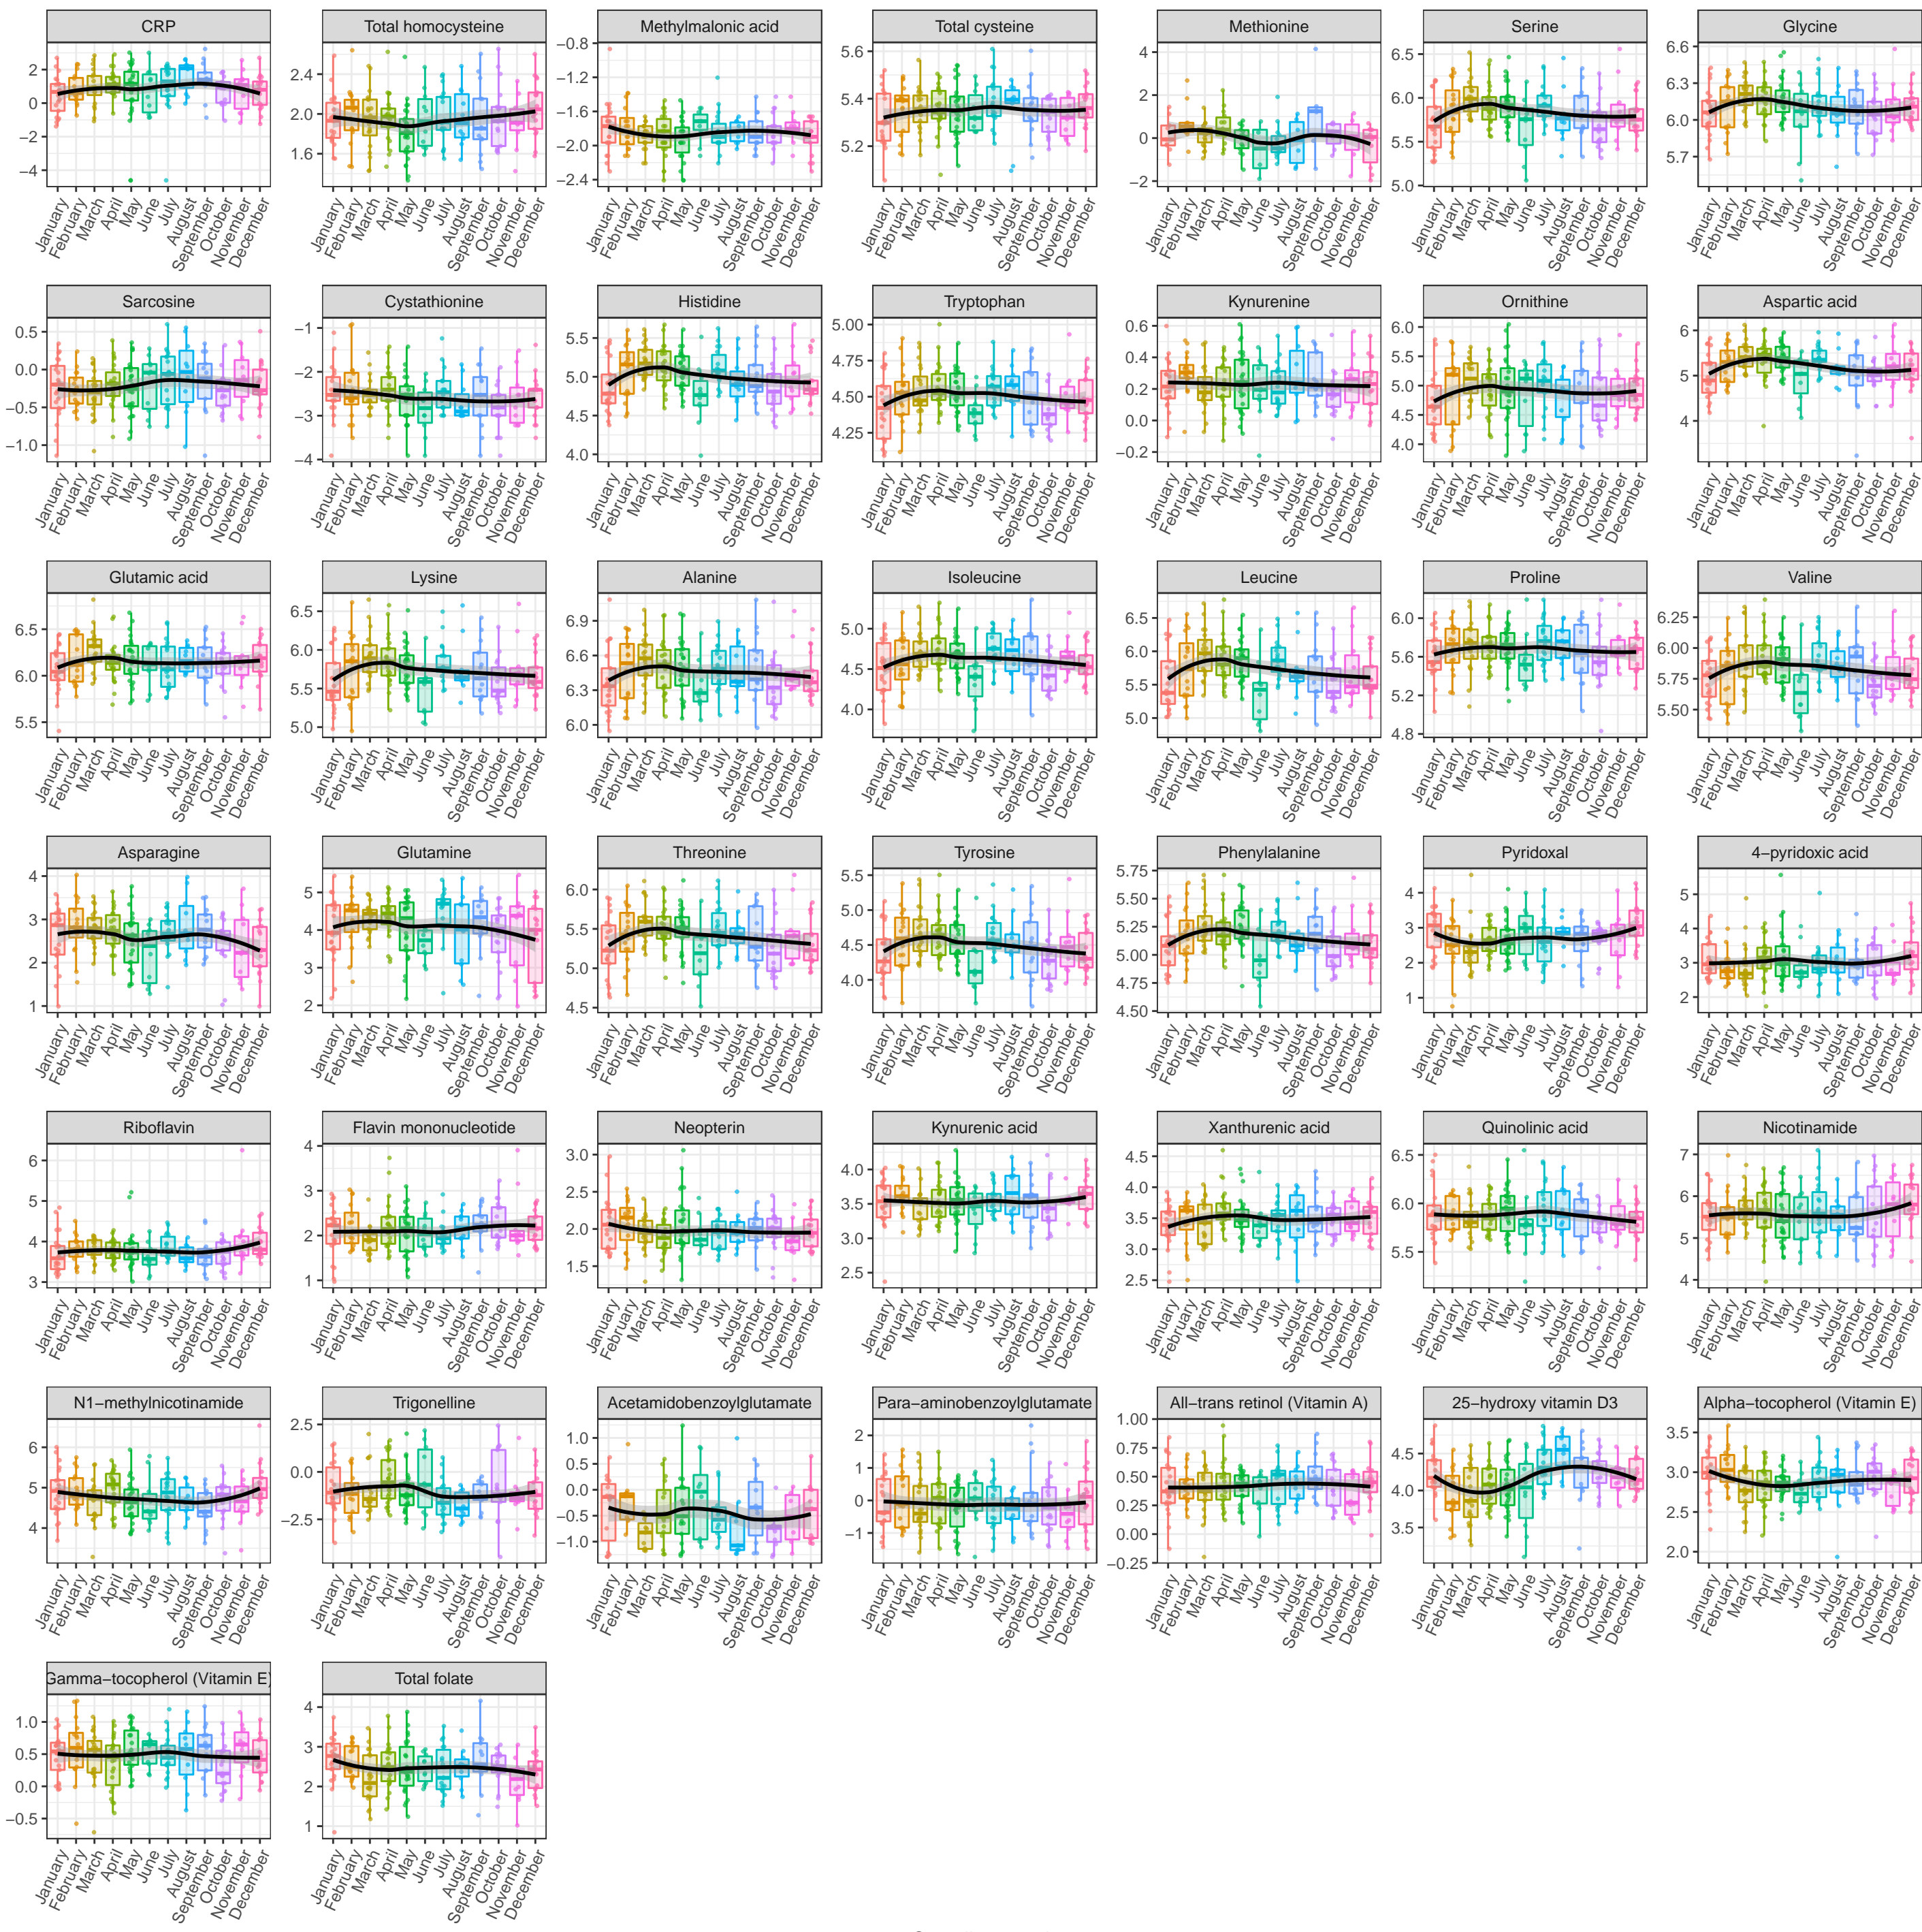

Sampling month

Supplement: Supplementary file 3 [file 21101799]
